# Supplementary material for: Physical limits of sea-level rise adaptation in global river deltas
Source: Research Square preprint supplement (doi:10.21203/rs.3.rs-6830002/v1), 2025-10-03
Supplement: Supplementary file 1 [file 90598d853fac9eb0cd30653f.pdf]

# Supplementary Information

## Physical limits of sea-level rise adaptation in global river deltas

Kiara G. Lasch, Jaap H. Nienhuis, Gundula Winter, Marjolijn Haasnoot

### Contents

|                                                                                   |    |
|-----------------------------------------------------------------------------------|----|
| SI1. Adaptation strategies (including examples) .....                             | 2  |
| SI2. Delta polygon extent .....                                                   | 3  |
| SI3. Equations and data sources of physical indicators .....                      | 4  |
| SI4. Support for thresholds selected .....                                        | 8  |
| SI5. Flood risks for global deltas and differences between climate scenarios..... | 11 |
| SI6. Model output comparison.....                                                 | 12 |
| SI6.1. Sensitivity analysis and model stress-testing.....                         | 12 |
| SI6.2. Literature assessment and model output comparison for 10 deltas .....      | 14 |

## SI1. Adaptation strategies (including examples)

We assess the physical feasibility of adaptation options for the following five adaptation strategies: advance, protect-closed, protect-open, accommodate, and retreat (Table SI1).

**Table SI1:** Description and examples of five adaptation strategies assessed in this study.

| Adaptation strategy                                                                                                                                                                                                                                                                                                                                                                                                                                                          | Examples                                                                                                                                                                                                                                                                                                                                                                                                                                                                                                                                                                                                                                   |
|------------------------------------------------------------------------------------------------------------------------------------------------------------------------------------------------------------------------------------------------------------------------------------------------------------------------------------------------------------------------------------------------------------------------------------------------------------------------------|--------------------------------------------------------------------------------------------------------------------------------------------------------------------------------------------------------------------------------------------------------------------------------------------------------------------------------------------------------------------------------------------------------------------------------------------------------------------------------------------------------------------------------------------------------------------------------------------------------------------------------------------|
| <b>Advance:</b> involves the extension of the coastline seaward to build flood defences and is typically used to create new land for nature and recreation or urban and industrial developments. Pumps are installed to pump excess rainwater and river flows across the new coastline.                                                                                                                                                                                      | <ul style="list-style-type: none"> <li>• The Flevoland polder and the Afsluitdijk pumping station in the Rhine Meuse delta, the Netherlands<sup>1,2</sup></li> <li>• Advance strategy along the coast of the Netherlands<sup>3,4</sup></li> <li>• The Great Garuda project for Jakarta city, Indonesia<sup>5</sup></li> <li>• Reclaimed land to be used free up space on the mainland, Singapore<sup>6</sup></li> <li>• Development of new coastal estates in Eko Atlantic City, Nigeria<sup>7</sup></li> <li>• Terrebonne basin barrier island in Louisiana<sup>8</sup></li> </ul>                                                        |
| <b>Protect-closed:</b> The protect-closed strategy aims to keep flood waters away by constructing engineered structures, such as levees, along the coastline, which protects the inland areas from the sea. In addition, pumps are installed at the river mouths to pump water from the low-lying areas to the sea.                                                                                                                                                          | <ul style="list-style-type: none"> <li>• Pumps along the IJmuiden mouth in the Rhine Meuse delta, the Netherlands<sup>3</sup></li> <li>• A series of dikes, floodwalls and pumping stations along stretches of the coast in Louisiana<sup>9</sup></li> </ul>                                                                                                                                                                                                                                                                                                                                                                               |
| <b>Protect-open:</b> Following protect-open, an open connection with the sea is maintained while still protecting the inland areas from SLR. This is achieved by extending sea level influences upstream by building levees along the coast and rivers. Moreover, storm surge barriers are built at the river mouths along the coast. These barriers remain open for most of the time, but close during storm surge events to mitigate the effects of elevated water levels. | <ul style="list-style-type: none"> <li>• The Maeslantkering storm surge barrier in South Holland the Rhine Meuse delta, the Netherlands<sup>10</sup></li> <li>• A series of dikes, barriers and walls along the estuary, as well as the Thames barrier in London, United Kingdom<sup>11,12</sup></li> <li>• Floodwalls and the Inner Harbor Navigation canal (IHNC) Lake Borgne Surge Barrier in Louisiana<sup>8</sup></li> <li>• Dikes along distributaries of the Ganges river in Dhaka, Bangladesh<sup>13</sup></li> <li>• Seawalls, revetments and sand dunes along part of the coast in the Nile Delta, Egypt<sup>14</sup></li> </ul> |

|                                                                                                                                                                                                                                                                                                                                                                                                                                                              |                                                                                                                                                                                                                                                                                                                                                                                                                                                                                                                                                       |
|--------------------------------------------------------------------------------------------------------------------------------------------------------------------------------------------------------------------------------------------------------------------------------------------------------------------------------------------------------------------------------------------------------------------------------------------------------------|-------------------------------------------------------------------------------------------------------------------------------------------------------------------------------------------------------------------------------------------------------------------------------------------------------------------------------------------------------------------------------------------------------------------------------------------------------------------------------------------------------------------------------------------------------|
| <p><b>Accommodate:</b> adopts a ‘living with water’ concept. This strategy implies the continued use of at-risk areas, whereby, no attempt is made to prevent flooding. Instead, land use is adjusted to reduce the vulnerability to SLR and associated floods by elevating the urban areas and surrounding land. This approach often aims to mitigate the economic and health costs associated with floods instead of preventing the flood<sup>15</sup></p> | <ul style="list-style-type: none"> <li>• Building raising following SLR in the Mississippi delta, the United States of America<sup>16</sup></li> <li>• Elevating homes in the Mekong delta, Vietnam<sup>17</sup></li> <li>• Flood proofing houses and infrastructure in Los Angeles, USA<sup>18</sup></li> <li>• Tidal river management in parts of the Ganges-Brahmaputra-Meghna delta, Bangladesh<sup>19</sup></li> <li>• Flood proofing structures in the Riö-Grande delta, United States of America<sup>20</sup></li> </ul>                       |
| <p><b>Retreat:</b> focuses on a planned and permanent relocation of people, assets, and activities to reduce exposure to coastal hazards caused by SLR-induced flooding.</p>                                                                                                                                                                                                                                                                                 | <ul style="list-style-type: none"> <li>• Climate-driven community retreat on the Isle de Jean Charles, Gulf of Mexico<sup>21</sup></li> <li>• Voluntary buyouts of flood-prone properties in the Mississippi river valley, United States of America<sup>22</sup></li> <li>• Permanent retreat from damaged homes and infrastructure in the Greater Toronto Area (GTA), Canada<sup>15</sup></li> <li>• Forced resettlement programs in the Mekong delta, Vietnam<sup>17</sup></li> <li>• Household scale resettlement, Vietnam<sup>17</sup></li> </ul> |

## 22 SI2. Delta polygon extent

23 The global delta dataset defines deltas as four-point deltaic extents (DN = delta node, RM =  
 24 river mouth, S1 = shoreline position 1, S2 = shoreline position 2)(Fig. SI1)<sup>23</sup>.

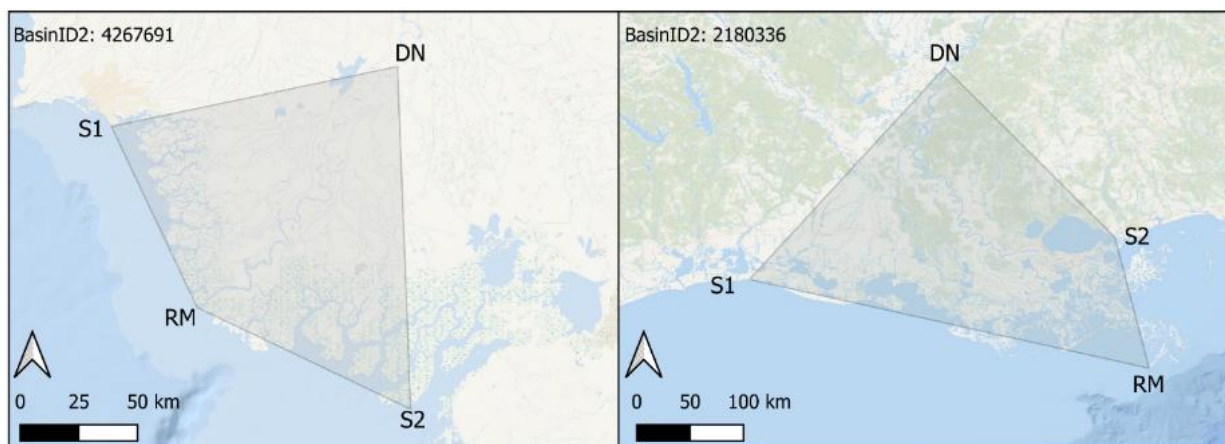

**Fig. SI1:** Two examples of the four deltaic points that define the delta polygon. DN represents the delta node, S1 and S2 represent the lateral shoreline positions, and RM represents the river mouth<sup>23</sup>.

### SI3. Equations and data sources of physical indicators

The physical indicators for each strategy are calculated using the following equations in a simple geometric model:

#### Advance

Volume of material required ( $m^3$ ) to extend the coastline seaward (Fig. SI2) is calculated using:

$$V_{adv} = \left( \frac{1}{2} * D * d * c \right) + (RSLR * D * c) \quad (1)$$

where  $D$  is the offshore distance (m);  $d$  is the offshore depth (m) calculated using the bathymetric slope ( $m.m^{-1}$ ) immediately offshore of the river mouth which is assumed to be linear<sup>24</sup>; and  $c$  is the coastline length (m). The coastline length is calculated as the distance between the coordinates which demarcate the shoreline position S1 and S2 in the delta polygon<sup>23,25</sup> (Fig. SI1). Finally, RSLR is calculated using the predicted SLR (m) under three climate scenarios (SSP1-2.6, SSP2-4.5 and SSP5-8.5)<sup>26</sup> and vertical land motion (VLM)(mm/yr)<sup>27</sup> for each delta by 2100. We include subsidence in this equation because omitting it from global SLR risk assessments may underestimate exposure<sup>28</sup>.

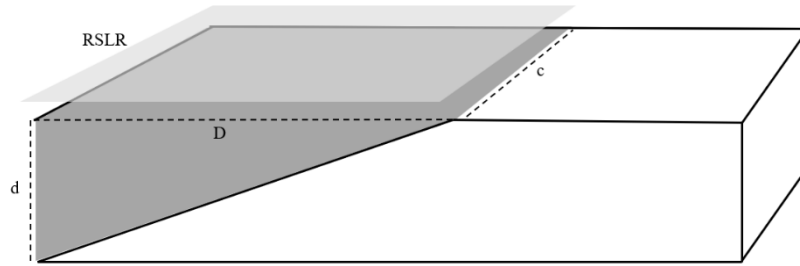

**Fig. SI2:** Shape of the volume of material required to extend the coastline seaward based on Eqn. 1.

The total amount of river sediment collected to advance the coastline seaward over 50 years is calculated using:

$$Q_s (m^3.s^{-1}) = \frac{Q_s (kg.s^{-1})}{\rho_b (kg.m^{-3})}$$

$$Sediment\ collected_{adv} (m^3.s^{-1}) = Q_s * R_r * T \quad (2)$$

Here,  $Q_s$  (kg/s) is the mean annual river sediment discharge ( $m^3/s$ )<sup>29,30</sup> which is assumed to remain unchanged until 2100 (see Supplementary Text SI6). Sediment discharge is converted to  $m^3/s$  by assuming the bulk density of the sediment ( $\rho_b$ ) is  $1600kg/m^3$ . We estimate the total volume of sediment collected over a 50-year period ( $T$ , s) and using different sediment retention rates ( $R_r$ , %)(see Methods). Since sediment retention rates vary between 2 and 100% according to existing literature (Table SI2), we consider three representative retention estimates, namely 20%, 40% and 80% which correspond to low-resource, current known and innovative thresholds, respectively. If, for example, the volume of river sediment retained at a 40%

retention rate exceeds the sediment required to aggrade the coastline seaward, then the measure is considered physically under current known conditions. However, if the volume of river sediment contained at a 20% retention rate is insufficient to meet the sediment demand for the coastline extension, the measure is considered unfeasible under low-resource conditions.

Alternatively, deltas can collect offshore sand as a material source to aggrade a new coastline instead of river sediment. The depth (m) at 10km offshore for sand mining (beach nourishment) is calculated using the offshore distance (m) and bathymetric slope<sup>24</sup>. Under each climate scenario, we add the SLR value to this depth calculation<sup>26</sup>.

The pump capacity (PC)(m<sup>3</sup>/s) is calculated using:

$$PC_{mean} = Q_r \quad (3)$$

Where the mean pump capacity ( $PC_{mean}$ ) is either equal to the mean annual river discharge,  $Q_r$  (m<sup>3</sup>/s)<sup>29,30</sup> or the maximum river discharge, assuming a 100% pump efficiency and that the river discharge will not change by 2100 (see Supplementary Text SI6). The maximum river discharge is the 99<sup>th</sup> percentile of discharges, which is a modelled value from the Water Balance Model (WBM) reanalysis between 1980 and 2012<sup>31</sup>. We base pump requirements on the mean river discharge, assuming the excess water during higher river flows can be diverted to retention areas. We also considered the maximum river discharge without assuming the availability of retention areas for excess water.

#### Protect-closed

The volume of material required (m<sup>3</sup>) to build a smooth, gentle-sloped (1:6) coastal levee (Fig. SI3) is calculated using:

$$\begin{aligned} h_c &= 3 * (H_w + H_{ss}) \\ b_{1c} &= h_c \\ b_{2c} &= b_{1c} * 6 \\ V_{coast} &= \left( \frac{1}{2} * (b_{1c} + b_{2c}) * h_c * c \right) + (RSLR * b_{2c} * c) \end{aligned} \quad (4)$$

Variable definitions:

- $h_c$ : Coastal levee height (m)
- $H_w$ : Mean significant wave height (m)<sup>24</sup>
- $H_{ss}$ : Storm surge height (m)<sup>23,32</sup>
- $b_{1c}$ : Short base of the coastal levee (i.e. the top of the levee)
- $b_{2c}$ : Long base of the coastal levee (i.e. the bottom of the levee)
- $V_{coast}$ : Total volume of material (m<sup>3</sup>) required to build coastal levees
- $c$ : Coastline length
- $RSLR$ : Relative sea-level rise (m)

The significant wave height ( $H_w$ ) is the average of the largest 1/3 of wave heights using the NOAA WAVEWATCH III 30-year Hindcast Phase 2 between 1979 and 2009<sup>33</sup>.  $H_{ss}$  data has a 100-year return-period<sup>23</sup> and is calculated using the median of recorded storm surge values<sup>32</sup>. RSLR is the sum of the predicted SLR (m) following three climate scenarios, namely SSP1-2.6, SSP2-4.5 and SSP5-8.5<sup>26</sup>, and the VLM (mm/yr)<sup>27</sup> by 2100.

The pump capacity ( $m^3/s$ ) is calculated using the same equation (Eqn. 3) and data as discussed above, and the maximum river discharge is tested in this case too.

#### Protect-open

The volume of levee material required ( $m^3$ ) to build levees (Fig. SI3) along the coast and both sides of the rivers is calculated using:

$$\begin{aligned} h_r &= 5m = b_{1r} \\ b_{2r} &= b_{1r} * 6 \\ V_{river} &= 2 * \left( \frac{1}{2} * (b_{1r} + b_{2r}) * h_r * L_r \right) + (RSLR * b_{2r} * L_r) \\ V_{total} &= V_{coast} + V_{river} \end{aligned} \quad (5)$$

Variable definitions:

- $h_r$ : River levee height (m)
- $b_{1r}$ : Short base of the river levee (i.e. the top of the levee)
- $b_{2r}$ : Long base of the river levee (i.e. the bottom of the levee)
- $V_{river}$ : Total volume of material ( $m^3$ ) required to build river levees on both sides of the river
- $L_r$ : Total river length (m)<sup>34</sup>
- RSLR: Relative sea-level rise (m)
- $V_{total}$ : Total volume of material ( $m^3$ ) required to build both coastal and river levees
- $V_{coast}$ : Total volume of material ( $m^3$ ) required to build coastal levees (Eqn. 4)

Here,  $h_r$  is the river levee height (m) which we base on existing studies that show that levee heights can vary between 1m and 12m high, and can reach up to 21m<sup>35–37</sup>. We use an average levee height of 5m which excludes the uncommon and extreme cases. We extract the river lengths ( $L_r$ ) from the Surface Water and Ocean Topography River Database (SWORD) dataset which provides high-resolution river reaches (~10km) and river nodes (200m) at a global scale<sup>34</sup>. Where SWORD is missing a river length (214 cases) within the polygon, we calculate the river length manually. We assume that the river length is equal to the length between the coordinates demarcating the delta node (DN) and the river mouth (RM)(Fig. SI1). DN, in this case, is the upstream-most bifurcation of the parent channel, and RM is the location of the widest river mouth along the coastline. RSLR is the sum of the predicted SLR (m) following three climate scenarios, namely SSP1-2.6, SSP2-4.5 and SSP5-8.5<sup>26</sup>, and the VLM (mm/yr)<sup>27</sup> by 2100.

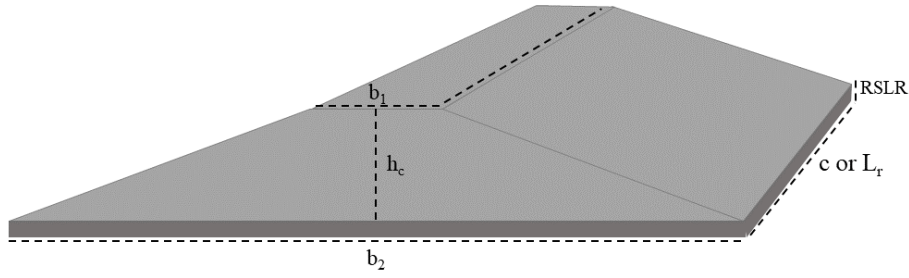

**Fig. SI3:** Assumed shape of the levee to calculate the volume of material required for construction, following Eqn. 4 and 5. In the equations,  $b_{1c}$  refers to the  $b_1$  for coastal (c) levees, whereas  $b_{1r}$  refers to  $b_1$  of river (r) levees.

The river width required to build a storm surge barrier (m) is extracted and summed from the SWORD dataset<sup>34</sup>. Where river widths are missing (369 deltas), we calculate these values using a simple river-mouth width ( $w_m$ ) estimate<sup>38</sup>:

$$w_m = \beta * k * a * L + w_u \quad (6)$$

Here,  $\beta = w/d$ , where  $w$  the channel width and  $d$  is the channel depth,  $k$  is the proportionality coefficient that relates the tidal prism to the cross-sectional area to the river mouth,  $a$  is the offshore tidal amplitude (m),  $L$  is the estuarine length scale for long-wave propagation in a distributary channel (m) and  $w_u$  is the fluvial channel width (m)<sup>38</sup>. The calculated river-mouth widths have been compared to observed river-mouth widths and show very good agreement, with no systematic bias<sup>38</sup>. However, the calculated river-mouth widths tend to be lower than those from SWORD, likely because the river-mouth estimate assumes a single channel whereas values from SWORD include multiple river mouths whose combined width can be ~50% greater. However, the river-mouth width estimate is used in small deltas, typically with only one distributary mouth.

#### Accommodate

The 2019 Copernicus global land cover dataset is used to identify land cover within each polygon<sup>39</sup>. This dataset distinguishes 21 land cover types, which we categorize into 3 main groups, namely nature, cropland, urban (built-up). We isolate urban land use from this dataset, overlay it with ~1km resolution flood maps containing global inundation projections with global mean values that correspond to the climate scenario used<sup>40</sup>, and downscale it to 100m resolution. The flood maps in our analysis were created using a static flood modelling approach with extreme sea levels from combined tide and surge levels and accounting for national estimates of flood protection standards. These maps use the Multi-Error-Removed Improved-Terrain (MERIT) digital elevation model. MERIT has previously been found to be consistently higher than the reference, specifically in areas with built-up land cover<sup>41</sup>. This may result in an underestimation in the flooding in the urban areas.

The flood depth of each urban land use grid cell is identified and the thresholds are applied, assuming the urban areas can be raised by of 0.5m, 1m or 2m. If the mean flood depth in the urban area, based on the flood maps<sup>40</sup>, exceeds 0.5m, then raising by 0.5m is unfeasible. Similarly, if the mean flood depth in the urban area exceeds 1m or 2m, then raising by 1m or 2m is unfeasible. However, if the flood depth is lower than 1m, then a 1m elevation is considered to be physically feasible.

#### Retreat

The land availability for a retreat is calculated by dividing the urban flooded area (m<sup>2</sup>) by three different areas where the urban flooded area can retreat to (see Methods).

$$LA_{ret} = \frac{\text{Area to retreat to (m}^2\text{)}}{\text{Urban flooded area (m}^2\text{)}} \quad (7)$$

Where  $LA_{ret}$  is expressed as a ratio between 0 and 1. A value greater than 1 indicates that retreat is physically feasible. Retreat to areas outside the delta is always deemed physically feasible.

#### Do nothing (no strategy required)

The presence or absence of flood risks in the delta polygon are identified using the flood maps<sup>40</sup>. Where no flood risks were predicted under each climate scenario by 2100, these deltas are assumed to do nothing.

### **SI4. Support for thresholds selected**

The “current known” threshold is determined using existing examples of adaptation measures in literature, and refers to the largest known or most commonly used value of a measure (Table SI2). While our indicators’ thresholds are based on currently implemented scales of measures, these thresholds may vary based on a delta’s capabilities and resources.

**Table SI2:** Database of existing examples of measures within adaptation strategies. These measures represent the physical indicators in our assessment and the magnitude values are used to create the respective thresholds.

| Measure       | Area/ name, Country                   | Income level (World Bank) <sup>42</sup> | Magnitude                                 | Ref           |
|---------------|---------------------------------------|-----------------------------------------|-------------------------------------------|---------------|
| Pump capacity | New Orleans, United States of America | High income                             | ~55m <sup>3</sup> /s per pump (22 pumps)  | <sup>43</sup> |
|               | IJmuiden, the Netherlands             | High income                             | ~43m <sup>3</sup> /s per pump (6 pumps)   | <sup>44</sup> |
|               | Afsluitdijk, the Netherlands          | High income                             | ~45m <sup>3</sup> /s per pump (6 pumps)   | <sup>1</sup>  |
|               | Fens, United Kingdom                  | High income                             | ~16.6m <sup>3</sup> /s per pump (6 pumps) | <sup>45</sup> |
| Levee heights | Mississippi, United States of America | High income                             | ~12m high (~5.6km total extent)           | <sup>46</sup> |



|                                   |                                                                  |                     |                                                                         |      |
|-----------------------------------|------------------------------------------------------------------|---------------------|-------------------------------------------------------------------------|------|
|                                   | The Netherlands                                                  | High income         | ~4-7m high (~22,000km total extent)                                     | 47   |
| Seawall height                    | Saemangeum, Korea                                                | High income         | 36m (33.9km total extent)                                               | 48   |
| Land reclamation                  | Palm Jumeirah, Dubai                                             | High income         | 700ha = ~6km <sup>2</sup>                                               | 49   |
|                                   | Hong Kong International Airport, China                           | Upper-middle income | 250million m <sup>3</sup> of material was dredged for an area of 1248ha | 50   |
|                                   | Maasvlaakte 2 harbour, Rotterdam, the Netherlands                | High income         | 20km <sup>2</sup> with an offshore extension of ~3km                    | 51   |
|                                   | Pulau Tekong, Singapore                                          | High income         | 800ha polder                                                            | 6,43 |
| Artificial shoreline construction | Jakarta, Indonesia                                               | Upper-middle income | 18.93km <sup>2</sup> new coastline                                      | 52   |
|                                   | Istanbul, Turkey                                                 | Upper-middle income | 9.23km <sup>2</sup> new coastline                                       | 52   |
| Storm surge barrier               | Eastern Scheldt Barrier, the Netherlands                         | High income         | 9000m                                                                   | 53   |
|                                   | Saint Petesburg Flood Prevention Facility Complex (FPFC), Russia | High income         | 25000m                                                                  | 54   |
|                                   | Maeslant barrier, the Netherlands                                | High income         | 400m                                                                    | 53   |
|                                   | Hartel Barrier, the Netherlands                                  | High income         | ~150m                                                                   | 55   |
|                                   | Thames Barrier, United Kingdom                                   | High income         | 520m                                                                    | 55   |
|                                   | Venice MOSE project, Italy                                       | High income         | 3200m                                                                   | 55   |
|                                   | Ems barrier, Germany                                             | High income         | 462m                                                                    | 56   |
|                                   | Seabrook barrier, New Orleans, United States of America          | High income         | 130m                                                                    | 55   |
|                                   | IHNC Surge Barrier, New Orleans, United States of America        | High income         | 2890m                                                                   | 57   |

|              |                                       |                     |                     |    |
|--------------|---------------------------------------|---------------------|---------------------|----|
| Home raising | Vietnam                               | Lower-middle income | 0.3-0.8m (39 homes) | 17 |
|              | Genuk, Indonesia                      | Upper-middle income | 0.5m (170 homes)    | 58 |
|              | Philippines Islands                   | Lower-middle income | 0.3m (169 homes)    | 59 |
|              | Mississippi, United States of America | High income         | 3.6m (1 gymnasium)  | 16 |
|              | Mississippi, United States of America | High income         | 1.8m                | 60 |
| Retreat      | Mozambique                            | Low income          | 43,400 families     | 61 |
|              | Vietnam                               | Lower-middle income | Household scale     | 17 |
|              | Vietnam                               | Lower-middle income | Neighbourhood scale | 17 |
|              | Isle de Jean Charles, Gulf of Mexico  | Upper-middle income | Community retreat   | 21 |

**Table SI3:** Examples of published natural sediment retention rate estimates in delta plains.

| Delta, Country         | Sediment retention rate (%) | Source |
|------------------------|-----------------------------|--------|
| Amazon, Brazil         | 41 (over 15 years)          | 62–66  |
| Guadiana, Portugal     | 2                           | 67     |
| Burdekin, Australia    | 2                           | 68,69  |
| Mekong, Vietnam        | 102                         | 70–72  |
| Rhine, the Netherlands | 13 to 67                    | 73,74  |
| Ob, Russia             | 43 (over 30 years)          | 75     |
| Yangtze, China         | 37                          | 76,77  |

The “innovative” threshold is defined as twice the value of the “current known” threshold (Table 2 in manuscript). This threshold reflects the importance of scaling-up measures for long term sustainability<sup>78</sup>. While there are currently no projections for how adaptation technologies will evolve by 2100, there have been significant increases in technological and infrastructural capabilities over the last 100 years. For example, between 1970 and the late 20<sup>th</sup> century, there was a shift from manual data collection to modern, high-technology digital modelling methods<sup>79</sup>, and nowadays, artificial intelligence (AI) and machine learning (ML) offer even more opportunities for flood risk assessments<sup>79,80</sup>. Beyond technological modelling advancements, flood management practices have advanced between 2000 and 2017, from costly and basic structural flood control measures that impact biodiversity, to environmentally friendly adaptation strategies that build resilience and enable rapid recovery<sup>81</sup>. More specifically, in the Netherlands, flood defences have evolved from the Afsluitdijk (1932) and the Delta Works with storm surge barriers like the Eastern Scheldt (1986) and Maeslant Barrier (1997) to recent adaptive and nature-based projects such as the Room for the River and the Sand Motor<sup>82</sup>. This reflects the innovation in scale, technology, and sustainability over the last

century. As such, assuming a twofold increase in technological capabilities by 2100 is perhaps conservative, but also more realistic than an extrapolation based on the past.

For other strategies, including accommodate where homes are raised by more than 1m, or retreat where people and assets are relocated outside of the delta, such technologies to implement these measures at “innovative” scales already exist (Table SI2) but have not been implemented delta-wide, which would require innovation. Similarly, while one storm-surge barrier of 9km has already been constructed (Table SI2), constructing multiple barriers of similar scale would also require innovation in terms of resources, space and planning. Thus, the innovative threshold not only represents possible physical limits of technology (in the case of pump capacity), but also the application of measures at a larger scale (accommodate or protect-open) and the coordination required for their implementation.

## SI5. Flood risks for global deltas and differences between climate scenarios

Our data shows that all 769 global deltas will experience sea-level rise following each climate scenario (Mean = 0.48m under SSP1-2.6; Mean = 0.6m under SSP2-4.5; Mean = 0.94m under SSP5-8.5). Additionally, at least 79% of global deltas will experience flooding under a 100-year return storm surge event. This increases to 82% and 86% under higher climate scenarios (SSP2-4.5 and SSP5-8.5), respectively.

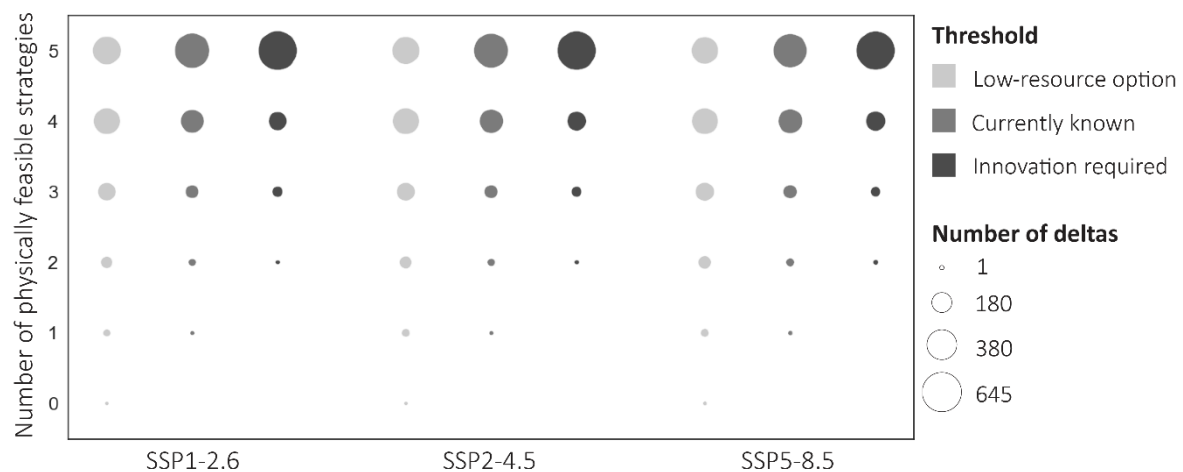

**Fig. SI4:** The number of physically feasible adaptation strategies (between 0 and 5) for global deltas following three climate scenarios. The size of the bubbles represent the number of deltas that can choose between each range of adaptation options. The coloured thresholds represent different scales of adaptation measures, namely low-resource measures that are physically feasible under limited resource conditions, current known measures that are the largest known examples of measures or commonly used scales of measures, and innovative measures which are only physically feasible with technological advancements.

However, when comparing the number of physically feasible adaptation strategies for deltas across climate scenarios, we find that the differences between scenarios are minor (1.62% decrease; Fig. SI4). Instead, the thresholds applied to the adaptation measures have a greater

influence on the number of strategies that are physically feasible (35% increase; Fig. SI4). For only one delta, namely the Rhine-Meuse delta in the Netherlands, there are no physically feasible low-resource strategies across all three climate scenarios (Fig. SI4). In this delta, only current known scales of measures or innovative solutions are physically feasible given the deltas large physical characteristics, large urban area, and large flooded extent.

## SI6. Model output comparison

### SI6.1. Sensitivity analysis and model stress-testing

To validate the model performance under extreme conditions, we perform a sensitivity test by increasing or decreasing parameters by an order of magnitude well beyond plausible ranges ( $\pm 10$  or  $\times/\div 10$ )(Fig. SI5). This confirms the expected expansion of the PSS when the delta's physical characteristics are small, and the contraction of the PSS when the delta's physical characteristics are large. This stress test serves as a boundary check which illustrates model reliability rather than reflecting parameter uncertainty.

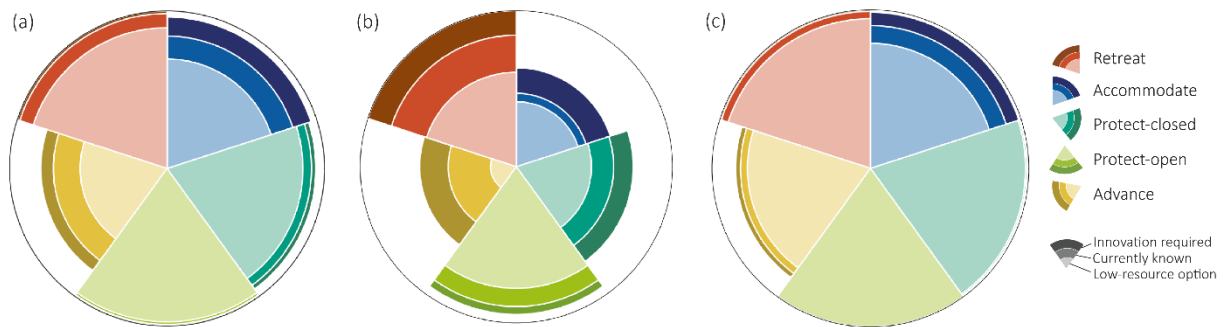

**Fig SI5:** Radar plots comparing (a) the physical solution space (PSS) of global deltas under an SSP2-4.5 scenario, with the outcomes from a stress-test of the model by (b) increasing or (c) decreasing input parameters well beyond plausible ranges to assess how the PSS contracts or expands, respectively.

However, we also assess parameter uncertainty by performing a sensitivity analysis. Based on projected changes in river discharge, mean flow is expected to vary between approximately a decrease of 23% and increase of 65% across river basins<sup>83</sup>, while global mean river discharge is projected to increase by 2%, 6%, 7.5%, and 11% under RCP2.6, 4.5, 6.0, and 8.5 scenarios, respectively, by the end of this century<sup>84</sup>. In contrast, projected sediment discharge for many deltas around the world shows a reduction in sediment flux, with mean declines of approximately 38% by 2100<sup>85</sup>, while the mean global sediment flux is projected to increase by 11%, 15%, 14%, and 16.4% across the four emission scenarios<sup>84</sup>. We use these projections to test the sensitivity of our input parameters on the physical feasibility of strategies. Specifically, we vary river discharge between  $-23\%$  and  $+65\%$  and sediment flux between  $-38\%$  and  $+16\%$  to consider the full range of variability from both basin and global scale projections. Under decreased river discharge projections, we find that 13 additional deltas can adopt the protect-closed strategy under current known conditions given lower pump capacity requirements. However, under increased river discharge projections, 28 fewer deltas can adopt this strategy due to pump capacity constraints under current known conditions. We assume that projected

increases in maximum river discharge would also decrease the number of deltas that can adopt this strategy. Under decreased river and sediment discharge projections, the advance strategy becomes physically feasible for an additional 12 deltas given the lower pump capacity requirements. However, under increased river and sediment discharge projections, the number of deltas that can adopt advance decreases by 25 deltas, since installing larger river pumps become less physically feasible despite increased sediment to aggrade the coastline. This reveals that some input parameters, such as river discharge, have a greater influence on the physical feasibility of certain strategies, like advance. Moreover, while individual deltas are impacted by changes in these parameters which has implications for local scale decision-making, the general adaptation trends remain mostly consistent across the global scale.

We test the sensitivity of assuming 5m high river levees following the protect-open strategy by changing this height and recalculating the material requirements ( $2\text{m} = 8.4\text{km}^3$ ;  $5\text{m} = 14.56\text{km}^3$ ;  $10\text{m} = 33.64\text{km}^3$ ). We find that the overall message remains the same whereby the protect-open strategy has higher material requirements than protect-closed strategy, even when considering lower-end levee heights.

Finally, we explore the influence of the chosen innovative threshold on the PSS. We increase the threshold by an order of magnitude, as opposed to a twofold increase, and find that substantial innovation in technological capabilities does not necessarily imply more strategies are physically feasible. While certain adaptation measures, such as 10m stilts following accommodate or  $12,000\text{m}^3/\text{s}$  pumps following protect-closed, increase the PSS for some deltas, the PSS of other deltas remain unchanged due to fundamental physical characteristics. This highlights that innovation alone does not provide more adaptation opportunities. Given these findings, we maintain the assumption of a twofold increase in innovation capabilities for our analysis since it is more realistic by 2100, and avoids overestimating adaptation opportunities.

## SI6.2. Literature assessment and model output comparison for 10 deltas

The model is tested by first applying the equations and thresholds to 10 field deltas, which vary in size, degree of urbanization and flood extent (Fig. SI5; Table SI3).

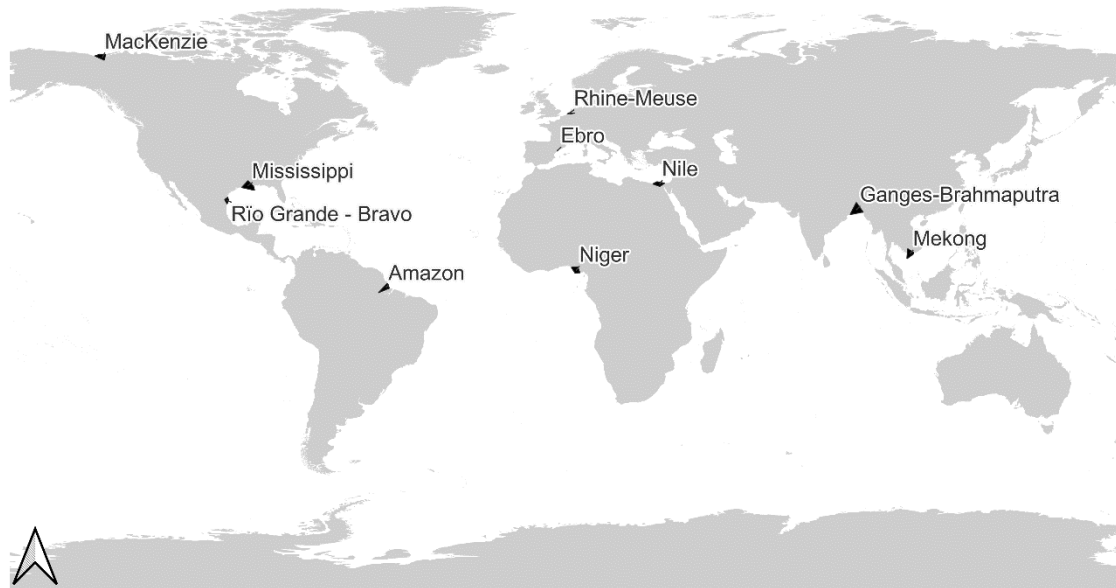

**Fig. SI6:** Names and locations of 10 deltas for model testing.

**Table SI3:** Delta names and country of 10 deltas for model testing.

| Number | Delta name                | Country                  |
|--------|---------------------------|--------------------------|
| 1      | Amazon                    | South America            |
| 2      | Ebro                      | Spain                    |
| 3      | Ganges-Brahmaputra-Meghna | Bangladesh               |
| 4      | Mekong                    | Vietnam                  |
| 5      | MacKenzie                 | Canada                   |
| 6      | Mississippi               | United States of America |
| 7      | Niger                     | Nigeria                  |
| 8      | Nile                      | Egypt                    |
| 9      | Rhine-Meuse               | The Netherlands          |
| 10     | Riö Grande- Bravo         | United States of America |

We compare our model outputs with literature that focusses on current implemented adaptation measures and potential future strategies in these deltas. The model outcomes are mostly consistent with measures used in practice (Table SI4). For example, in the Ebro delta, future strategies based on literature include protect, advance, or accommodate, which we find to be physically feasible based on our model (Table SI4). Additionally, in the Mississippi delta, future measures to address flood risks include relocations within the delta, land raising or elevations of urban areas, and protective measures, which we also find to be physically feasible strategies in 2100 (Table SI4).

However, there are also measures in the literature that are not consistent in the PSS that we modelled. This may be primarily because we assessed the PSS assuming the strategy will be adopted across the entire delta, however, small scale, localized strategies may also be implemented in these deltas. For example, in the Ganges-Brahmaputra-Meghna delta, the modelled PSS is small, but according to literature, many other measures are already implemented in this delta at a smaller scale (Table SI4). Additionally, in some cases, the hazards that measures protect against, or the currently implemented measures based on literature are not measures that we assess within the adaptation strategy, as seen for the Ganges-Brahmaputra-Meghna and the Amazon delta, respectively (Table SI4).

**Table SI4:** Comparison between the calculated physical solution space, and the existing implemented or future strategies in the 10 deltas based on existing literature.

| Delta Name | PSS found in this study                                                             | Existing implemented strategies and future strategies                                                                                                                                                                                                                                                                                                                                                                                                                                                                                                                                                                 |
|------------|-------------------------------------------------------------------------------------|-----------------------------------------------------------------------------------------------------------------------------------------------------------------------------------------------------------------------------------------------------------------------------------------------------------------------------------------------------------------------------------------------------------------------------------------------------------------------------------------------------------------------------------------------------------------------------------------------------------------------|
| Amazon     | 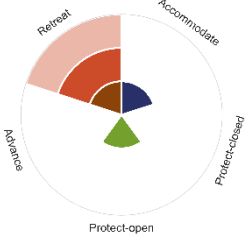  | <ul style="list-style-type: none"> <li>• Sediment deposition along the coast <sup>64</sup></li> <li>• Early warning systems<sup>86</sup></li> <li>• Forecasting and alert system for floods<sup>87</sup></li> <li>• River and rainwater drainage infrastructure<sup>88</sup></li> <li>• Raise the level of properties (25cm between road and flood level)<sup>88</sup></li> <li>• Flood resistant crops<sup>89</sup></li> <li>• Artificial islands and terraces built on flooded areas<sup>89</sup></li> <li>• Social organization and the process of awareness and training of the community<sup>88</sup></li> </ul> |
| Ebro       |  | <ul style="list-style-type: none"> <li>• Large dams and marshes in the area<sup>90</sup></li> <li>• Wetlands<sup>91</sup></li> </ul> <p><b>Future:</b></p> <ul style="list-style-type: none"> <li>• Sand dunes, natural beach barriers, artificial barriers, accretion of sediment supply, shift rice fields to wetlands to retain more sediment<sup>92</sup></li> <li>• Use sediment to naturally raise the land to compensate flooding<sup>93</sup></li> <li>• Wetland restoration, engineered structures (dikes, canals), sediment accretion to stop coastal retreats<sup>94</sup></li> </ul>                      |

|                           |                                                                                     |                                                                                                                                                                                                                                                                                                                                                                                                                                                                                                                                                                                                                                                                                                                                                                                                                                                                                            |
|---------------------------|-------------------------------------------------------------------------------------|--------------------------------------------------------------------------------------------------------------------------------------------------------------------------------------------------------------------------------------------------------------------------------------------------------------------------------------------------------------------------------------------------------------------------------------------------------------------------------------------------------------------------------------------------------------------------------------------------------------------------------------------------------------------------------------------------------------------------------------------------------------------------------------------------------------------------------------------------------------------------------------------|
| Ganges-Brahmaputra-Meghna | 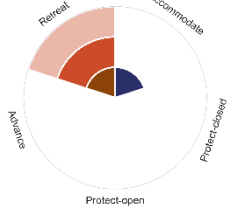   | <ul style="list-style-type: none"> <li>• Diked polder system that protect agriculture<sup>95</sup></li> <li>• Controlled flooding to allow sediment deposition (Sedimentation following dike breaches)<sup>96</sup></li> <li>• Cyclone shelters, dike construction, aquaculture, salt tolerant rice, floating infrastructure<sup>97</sup></li> <li>• Dikes and early warning systems<sup>98</sup></li> </ul> <p><b>Future:</b></p> <ul style="list-style-type: none"> <li>• Promote nature-based solutions to protect and restore natural or modified ecosystems, construction and rehabilitation of flood and drainage management measures, protection against flash floods and waves, reclamation and development of lands for expansion<sup>99</sup></li> <li>• Future migration from hazard-prone areas. Specifically, overseas migration over urban migration<sup>97</sup></li> </ul> |
| MacKenzie                 |  | <ul style="list-style-type: none"> <li>• Home to a very small population, so there are no protect adaptation measures.</li> </ul> <p><b>Future:</b></p> <ul style="list-style-type: none"> <li>• Promote emergency preparedness in schools, avoid building in areas vulnerable to erosion and slumping<sup>100</sup></li> </ul>                                                                                                                                                                                                                                                                                                                                                                                                                                                                                                                                                            |
| Mekong                    |  | <ul style="list-style-type: none"> <li>• Sedimentation basins created by permeable bamboo dams<sup>101</sup></li> <li>• Earth dike and floodplain (mangrove) restoration using T-groins/fences<sup>102</sup></li> <li>• Dike rings to protect agricultural crops and reduce local natural hazards<sup>103</sup></li> <li>• Mangrove restoration and national sea dike along entire coast<sup>104</sup></li> </ul> <p><b>Future:</b></p> <ul style="list-style-type: none"> <li>• Implement integrated flood impacts assessment, improve communication, and build capacity for flood management staffs, and infrastructural measures such as optimize the existing flood control infrastructures<sup>105</sup></li> <li>• Develop new technical measures for flood management and address the unwanted impacts of existing flood management infrastructures<sup>105</sup></li> </ul>        |



|             |                                                                                     |                                                                                                                                                                                                                                                                                                                                                                                                                                                                                                                                                                                                                                                                                                                                                                             |
|-------------|-------------------------------------------------------------------------------------|-----------------------------------------------------------------------------------------------------------------------------------------------------------------------------------------------------------------------------------------------------------------------------------------------------------------------------------------------------------------------------------------------------------------------------------------------------------------------------------------------------------------------------------------------------------------------------------------------------------------------------------------------------------------------------------------------------------------------------------------------------------------------------|
|             |                                                                                     | <ul style="list-style-type: none"> <li>Enhance early forecast and warning of extreme events, enhance monitoring, data collection and sharing, strengthen capacity on development of climate change adaptation strategies<sup>106</sup></li> </ul>                                                                                                                                                                                                                                                                                                                                                                                                                                                                                                                           |
| Mississippi | 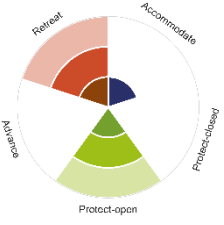   | <ul style="list-style-type: none"> <li>Community relocation from areas at risk<sup>22</sup></li> <li>Wetlands and levees<sup>107</sup></li> <li>Inner Harbor Navigation Canal-Lake (IHNC) Borgne Surge Barrier<sup>55</sup></li> <li>Home raising 5-6ft (1.5-1.8m)<sup>60</sup></li> <li>Forced relocation (involuntary relocation)<sup>108</sup></li> <li>Terrebonne Basin Barrier island restoration<sup>109</sup></li> </ul> <p><b>Future:</b></p> <ul style="list-style-type: none"> <li>Elevating the city of New Orleans<sup>16</sup></li> <li>Land raising in New Orleans<sup>60</sup></li> <li>Ring levee systems to protect specific areas<sup>110</sup></li> <li>Relocate within the delta if necessary<sup>108</sup></li> </ul>                                  |
| Niger       |   | <ul style="list-style-type: none"> <li>Construction of foot bridges with wood, stones and sand bags<sup>111</sup></li> <li>Raising walls with sand bags and/or blocks to divert flood water<sup>111</sup></li> <li>Use of mulching materials for crops and shades for animals<sup>111</sup></li> <li>Agricultural adaptation, such as crop diversification and altering the timing of operations<sup>112</sup></li> <li>Migration from climate risk areas<sup>112</sup></li> <li>Reclamation of wetlands/ river valleys<sup>112</sup></li> </ul> <p><b>Future:</b></p> <ul style="list-style-type: none"> <li>Need government, NGO, donor agencies and other stakeholders to come together to implement strategies (accommodate, protect, retreat)<sup>113</sup></li> </ul> |
| Nile        |  | <ul style="list-style-type: none"> <li>Seawalls, revetments, sand dunes, nourishment, and artificial sand dunes based on a geotextile sand-tube core, fish farming, regular dredging for coastal lakes and lagoons, and enforcing the coastal road were observed<sup>14</sup></li> </ul> <p><b>Future:</b></p> <ul style="list-style-type: none"> <li>Restoration and maintenance of sand dunes, maintaining coastal protection structures,</li> </ul>                                                                                                                                                                                                                                                                                                                      |

|                  |                                                                                    |                                                                                                                                                                                                                                                                                                                                                                                                                                                                                                                                                                                                          |
|------------------|------------------------------------------------------------------------------------|----------------------------------------------------------------------------------------------------------------------------------------------------------------------------------------------------------------------------------------------------------------------------------------------------------------------------------------------------------------------------------------------------------------------------------------------------------------------------------------------------------------------------------------------------------------------------------------------------------|
|                  |                                                                                    | <p>preserving existing wetlands, setting up regulations to restrict development in vulnerable areas, change of land use, development of comprehensive monitoring program<sup>114</sup></p>                                                                                                                                                                                                                                                                                                                                                                                                               |
| Rhine-Meuse      |   | <ul style="list-style-type: none"> <li>• Zuiderzee closure, groynes, river training (canalisation), Delta Works (dams, sluices, storm surge barriers), dikes, pumps, land reclamation<sup>115,116</sup></li> <li>• Floating homes<sup>117</sup></li> </ul> <p><b>Future:</b></p> <ul style="list-style-type: none"> <li>• Upgrading of current flood defense system<sup>118</sup></li> <li>• Permanent closure of estuaries, pumping high river discharges, maintenance of coastlines by beach nourishments<sup>3,119</sup></li> <li>• Frequent closure of storm surge barriers<sup>119</sup></li> </ul> |
| Riö Grande-Bravo |  | <ul style="list-style-type: none"> <li>• Levee system<sup>118</sup></li> <li>• Diversion dams<sup>118</sup></li> <li>• Pumping plant and conveyance channel used to reduce salinity of the river<sup>118</sup></li> <li>• Flood warning systems, flood proofing structures, land use regulations, development restrictions in flood<sup>20</sup></li> </ul>                                                                                                                                                                                                                                              |

322

323

## References

1. Rijkswaterstaat. The Afsluitdijk. <https://www.rijkswaterstaat.nl/en/projects/iconic-structures/the-afsluitdijk>.
2. Hoeksema, R. J. Three stages in the history of land reclamation in the Netherlands. *Irrigation and Drainage* 56, (2007).
3. van Alphen, J., Haasnoot, M. & Diermanse, F. Uncertain Accelerated Sea-Level Rise, Potential Consequences, and Adaptive Strategies in The Netherlands. *Water (Switzerland)* 14, (2022).
4. Van Alphen, J., Haasnoot, M., Diermanse, F. & Nillesen, A. L. Beyond the Limits of Present Adaptation Strategies: Exploring Strategies and Measures to Anticipate on Accelerated Sea-Level Rise in the Netherlands. *J Coast Zone Manag* 27, 7 (2024).
5. Colven, E. Understanding the Allure of Big Infrastructure: Jakarta's Great Garuda Sea Wall Project. (2017).
6. CNA. Singapore uses non-traditional method to create new land at Pulau Tekong - CNA. <https://www.channelnewsasia.com/watch/singapore-uses-non-traditional-method-create-new-land-pulau-tekong-5338486> (2025).
7. Ajibade, I. Can a future city enhance urban resilience and sustainability? A political ecology analysis of Eko Atlantic city, Nigeria. *International Journal of Disaster Risk Reduction* 26, 85–92 (2017).
8. State of Louisiana. Louisiana's Comprehensive Master Plan for a Sustainable Coast . (2023).
9. U.S. Army Corps of Engineers. Algiers Canal Risk Reduction Features. (2013).
10. De Bruijn, K. M., Diermanse, F. L. M., Weiler, O. M., De Jong, J. S. & Haasnoot, M. Protecting the Rhine-Meuse delta against sea level rise: What to do with the river's discharge? in *Journal of Flood Risk Management* vol. 15 (John Wiley and Sons Inc, 2022).
11. Lavery, S. & Donovan, B. Flood risk management in the Thames Estuary looking ahead 100 years. *Philosophical Transactions of the Royal Society A: Mathematical, Physical and Engineering Sciences* 363, 1455–1474 (2005).
12. Lumbroso, D. & Ramsbottom, D. Flood Risk Management in the United Kingdom: Putting Climate Change Adaptation Into Practice in the Thames Estuary. *Resilience: The Science of Adaptation to Climate Change* 79–87 (2018) doi:10.1016/B978-0-12-811891-7.00006-2.
13. Rahman, M. A. & Islam, S. Climate Change Adaptation in Urban Areas: A Critical Assessment of the Structural and Non-structural Flood Protection Measures in Dhaka. 161–173 (2019) doi:10.1007/978-3-030-05237-9\_11.
14. Sharaan, M., Iskander, M. & Udo, K. Coastal adaptation to Sea Level Rise: An overview of Egypt's efforts. *Ocean Coast Manag* 218, (2022).

- 362 15. Doberstein, B., Fitzgibbons, J. & Mitchell, C. Protect, accommodate, retreat or avoid  
363 (PARA): Canadian community options for flood disaster risk reduction and flood  
364 resilience. *Natural Hazards* 98, 31–50 (2019).
- 365 16. Erdman, J. A., Williams, E. A., James, C. W. & Coakley, G. P. Raising Buildings: The  
366 Resilience of Elevated Structures. 143–170 (2018) doi:10.1007/978-3-319-65663-2\_10.
- 367 17. Garschagen, M. Risky Change? Vietnam’s Urban Flood Risk Governance between  
368 Climate Dynamics and Transformation. *Pac Aff* 88, 599–621 (2015).
- 369 18. Aerts, J. C. J. H. *et al.* Pathways to resilience: adapting to sea level rise in Los Angeles.  
370 *Ann N Y Acad Sci* 1427, 1–90 (2018).
- 371 19. Islam, M. F., Middelkoop, H., Schot, P. P., Dekker, S. C. & Griffioen, J. Enhancing  
372 effectiveness of tidal river management in southwest Bangladesh polders by improving  
373 sedimentation and shortening inundation time. *J Hydrol (Amst)* 590, 125228 (2020).
- 374 20. U.S. Army Corps of Engineers. Coastal Texas Protection and Ecosystem Restoration  
375 Feasibility Study: Final Environmental Impact Statement.  
376 [https://www.swg.usace.army.mil/Portals/26/Coastal%20Texas%20Protection%20and%20Ecosystem%20Restoration%20Feasibility%20Study\\_2021FEIS\\_1.pdf](https://www.swg.usace.army.mil/Portals/26/Coastal%20Texas%20Protection%20and%20Ecosystem%20Restoration%20Feasibility%20Study_2021FEIS_1.pdf) (2021).  
377
- 378 21. Simms, J. R. Z., Waller, H. L., Brunet, C. & Jenkins, P. The long goodbye on a  
379 disappearing, ancestral island: a just retreat from Isle de Jean Charles. *J Environ Stud*  
380 *Sci* 11, 316–328 (2021).
- 381 22. Magnan, A. K. *et al.* Status of global coastal adaptation. *Nat Clim Chang* 13, 1213–1221  
382 (2023).
- 383 23. Edmonds, D. A., Caldwell, R. L., Brondizio, E. S. & Siani, S. M. O. Coastal flooding  
384 will disproportionately impact people on river deltas. *Nat Commun* 11, (2020).
- 385 24. Caldwell, R. L. *et al.* A global delta dataset and the environmental variables that predict  
386 delta formation on marine coastlines. *Earth Surface Dynamics* 7, 773–787 (2019).
- 387 25. Nienhuis, J. H., Cox, J. R., O’Dell, J., Edmonds, D. A. & Scussolini, P. A global open-  
388 source database of flood-protection levees on river deltas (openDELvE). *Natural*  
389 *Hazards and Earth System Sciences* 22, 4087–4101 (2022).
- 390 26. Fox-Kemper, B. Chapter 9: Ocean, Cryosphere and Sea Level Change. *Climate Change*  
391 *2021 – The Physical Science Basis* 1211–1362 (2021) doi:10.1017/9781009157896.011.
- 392 27. Oelsmann, J. *et al.* Regional variations in relative sea-level changes influenced by  
393 nonlinear vertical land motion. *Nat Geosci* 17, 137–144 (2024).
- 394 28. Nicholls, R. J. *et al.* A global analysis of subsidence, relative sea-level change and  
395 coastal flood exposure. *Nat Clim Chang* 11, 338–342 (2021).
- 396 29. Cohen, S., Kettner, A. J., Syvitski, J. P. M. & Fekete, B. M. WBMsed, a distributed  
397 global-scale riverine sediment flux model: Model description and validation. *Comput*  
398 *Geosci* 53, 80–93 (2013).

- 399 30. Nienhuis, J. H. *et al.* Global-scale human impact on delta morphology has led to net land  
400 area gain. *Nature* 577, 514–518 (2020).
- 401 31. Grogan, D. S. Global and regional assessments of unsustainable groundwater use in  
402 irrigated agriculture. (University of New Hampshire, 2016).
- 403 32. Muis, S., Verlaan, M., Winsemius, H. C., Aerts, J. C. J. H. & Ward, P. J. A global  
404 reanalysis of storm surges and extreme sea levels. *Nature Communications* 2016 7:1 7,  
405 1–12 (2016).
- 406 33. Chawla, A., Spindler, D. M. & Tolman, H. L. Validation of a thirty year wave hindcast  
407 using the Climate Forecast System Reanalysis winds. *Ocean Model (Oxf)* 70, 189–206  
408 (2013).
- 409 34. Altenau, E. H. *et al.* The Surface Water and Ocean Topography (SWOT) Mission River  
410 Database (SWORD): A Global River Network for Satellite Data Products. *Water Resour*  
411 *Res* 57, e2021WR030054 (2021).
- 412 35. Lim, M. Seven years after tsunami, Japanese live uneasily with seawalls | Reuters.  
413 [https://www.reuters.com/article/us-japan-disaster-seawalls/seven-years-after-tsunami-](https://www.reuters.com/article/us-japan-disaster-seawalls/seven-years-after-tsunami-japanese-live-uneasily-with-seawalls-idUSKCN1GL0DK/)  
414 [japanese-live-uneasily-with-seawalls-idUSKCN1GL0DK/](https://www.reuters.com/article/us-japan-disaster-seawalls/seven-years-after-tsunami-japanese-live-uneasily-with-seawalls-idUSKCN1GL0DK/) (2018).
- 415 36. Teramura, J. & Shimatani, Y. Advantages of the Open Levee (Kasumi-Tei), a Traditional  
416 Japanese River Technology on the Matsuura River, from an Ecosystem-Based Disaster  
417 Risk Reduction Perspective. *Water* 2021, Vol. 13, Page 480 13, 480 (2021).
- 418 37. Koelewijn, A., Pol, J. & van Schaijk, M. Performance of flood defences in the  
419 Netherlands during the 2021 summer floods. *Journal of Coastal and Riverine Flood Risk*  
420 2, (2023).
- 421 38. Nienhuis, J. H., Hoitink, A. J. F. T. & Törnqvist, T. E. Future Change to Tide-Influenced  
422 Deltas. *Geophys Res Lett* 45, 3499–3507 (2018).
- 423 39. Buchhorn, M. *et al.* Copernicus Global Land Service: Land Cover 100m: collection 3:  
424 epoch 2018: Globe. (2019) doi:10.5281/ZENODO.3518038.
- 425 40. Haasnoot, M. *et al.* Long-term sea-level rise necessitates a commitment to adaptation: A  
426 first order assessment. *Clim Risk Manag* 34, 100355 (2021).
- 427 41. Pronk, M. *et al.* DeltaDTM: A global coastal digital terrain model. *Scientific Data* 2024  
428 11:1 11, 1–18 (2024).
- 429 42. WDI - The World by Income and Region. [https://datatopics.worldbank.org/world-](https://datatopics.worldbank.org/world-development-indicators/the-world-by-income-and-region.html)  
430 [development-indicators/the-world-by-income-and-region.html](https://datatopics.worldbank.org/world-development-indicators/the-world-by-income-and-region.html).
- 431 43. Sewerage & Water Board of New Orleans. *Operations Report 2017*.  
432 [https://www.google.com/url?sa=t&source=web&rct=j&opi=89978449&url=https://sw](https://www.google.com/url?sa=t&source=web&rct=j&opi=89978449&url=https://swbno.org/Media/documents/Reports/2017_operations_report.pdf&ved=2ahUKEwjUpfy8mbSNAX4g_0HHdqUCnAQFnoECB0QAQ&usg=AOvVaw0b-c5vXV16wz69Z7bAhDTa)  
433 [bno.org/Media/documents/Reports/2017\\_operations\\_report.pdf&ved=2ahUKEwjUpfy](https://www.google.com/url?sa=t&source=web&rct=j&opi=89978449&url=https://swbno.org/Media/documents/Reports/2017_operations_report.pdf&ved=2ahUKEwjUpfy8mbSNAX4g_0HHdqUCnAQFnoECB0QAQ&usg=AOvVaw0b-c5vXV16wz69Z7bAhDTa)  
434 [8mbSNAX4g\\_0HHdqUCnAQFnoECB0QAQ&usg=AOvVaw0b-](https://www.google.com/url?sa=t&source=web&rct=j&opi=89978449&url=https://swbno.org/Media/documents/Reports/2017_operations_report.pdf&ved=2ahUKEwjUpfy8mbSNAX4g_0HHdqUCnAQFnoECB0QAQ&usg=AOvVaw0b-c5vXV16wz69Z7bAhDTa)  
435 [c5vXV16wz69Z7bAhDTa](https://www.google.com/url?sa=t&source=web&rct=j&opi=89978449&url=https://swbno.org/Media/documents/Reports/2017_operations_report.pdf&ved=2ahUKEwjUpfy8mbSNAX4g_0HHdqUCnAQFnoECB0QAQ&usg=AOvVaw0b-c5vXV16wz69Z7bAhDTa) (2017).
- 436 44. van Gijzen, L. & Bakker, A. M. R. Determining the future functional requirements of a  
437 pumping-weir station with the help of data-analysis. *Life-Cycle of Structures and*

- 438 *Infrastructure Systems - Proceedings of the 8th International Symposium on Life-Cycle*  
 439 *Civil Engineering, IALCCE 2023* 2612–2619 (2023) doi:10.1201/9781003323020-  
 440 318/DETERMINING-FUTURE-FUNCTIONAL-REQUIREMENTS-PUMPING-  
 441 WEIR-STATION-HELP-DATA-ANALYSIS-VAN-GIJZEN-BAKKER.
- 442 45. ITV News Anglia. Working harder than ever: UK’s biggest pumping station fending off  
 443 floods. [https://www.itv.com/news/anglia/2024-01-06/working-harder-than-ever-uks-](https://www.itv.com/news/anglia/2024-01-06/working-harder-than-ever-uks-biggest-pumping-station-fending-off-floods)  
 444 [biggest-pumping-station-fending-off-floods](https://www.itv.com/news/anglia/2024-01-06/working-harder-than-ever-uks-biggest-pumping-station-fending-off-floods) (2024).
- 445 46. Orleans Levee District. History: Building the Hurricane Protection System.  
 446 <https://www.leveeboard.org/history12.html>.
- 447 47. Dutch Dikes Foundation. Dutch Dikes. <http://dutchdikes.net/> (2014).
- 448 48. Samuel, K. Han River Renaissance: Seoul revives river’s legacy.  
 449 <https://www.korea.net/NewsFocus/Culture/view?articleId=190405#none> (2020).
- 450 49. Royal IHC. Creating Palm Islands. [https://www.royalihc.com/dredging/project-](https://www.royalihc.com/dredging/project-type/creating-palm-islands)  
 451 [type/creating-palm-islands](https://www.royalihc.com/dredging/project-type/creating-palm-islands).
- 452 50. Royal Boskalis Westminster N.V. Land reclamation Chek Lap Kok airport Hong Kong.  
 453 [https://boskalis.com/about-us/projects/land-reclamation-check-lap-kok-airport-hong-](https://boskalis.com/about-us/projects/land-reclamation-check-lap-kok-airport-hong-kong)  
 454 [kong](https://boskalis.com/about-us/projects/land-reclamation-check-lap-kok-airport-hong-kong).
- 455 51. Michon, S. Land Reclamation at Rotterdam.  
 456 <https://earthobservatory.nasa.gov/images/47122/land-reclamation-at-rotterdam> (2010).
- 457 52. Sengupta, D., Chen, R. & Meadows, M. E. Building beyond land: An overview of  
 458 coastal land reclamation in 16 global megacities. *Applied Geography* 90, 229–238  
 459 (2018).
- 460 53. Rijkswaterstaat. Maeslantkering.  
 461 [https://www.rijkswaterstaat.nl/water/waterbeheer/bescherming-tegen-het-](https://www.rijkswaterstaat.nl/water/waterbeheer/bescherming-tegen-het-water/waterkeringen/deltawerken/maeslantkering)  
 462 [water/waterkeringen/deltawerken/maeslantkering](https://www.rijkswaterstaat.nl/water/waterbeheer/bescherming-tegen-het-water/waterkeringen/deltawerken/maeslantkering).
- 463 54. Boskalis. Coastal protection, St. Petersburg. [https://boskalis.com/about-](https://boskalis.com/about-us/projects/coastal-protection-st-petersburg)  
 464 [us/projects/coastal-protection-st-petersburg](https://boskalis.com/about-us/projects/coastal-protection-st-petersburg).
- 465 55. Jonkman, S. N., Hillen, M. M., Nicholls, R. J., Kanning, W. & Van Ledden, M. Costs of  
 466 adapting coastal defences to sea-level rise - New estimates and their implications. *J*  
 467 *Coast Res* 29, 1212–1226 (2013).
- 468 56. Hofstede, J. Climate change and coastal adaptation strategies: the Schleswig-Holstein  
 469 perspective. *BALTICA* 21, 71–78 (2008).
- 470 57. Flood Protection Authority. *Info Sheet: IHNC-Lake Borgne Surge Barrier*.  
 471 [https://www.floodauthority.org/wp-content/uploads/2018/04/Info-Sheet-IHNC-Surge-](https://www.floodauthority.org/wp-content/uploads/2018/04/Info-Sheet-IHNC-Surge-Barrier.pdf)  
 472 [Barrier.pdf](https://www.floodauthority.org/wp-content/uploads/2018/04/Info-Sheet-IHNC-Surge-Barrier.pdf) (2018).
- 473 58. Khadiyanto, P., Soetomo, S. & Hadi, S. P. Settlement adaptation on a seawater tide  
 474 overflow area at the north part of Semarang, Indonesia. (2015) doi:10.1111/jfr3.12167.

- 475 59. Jamero, M. L. *et al.* Small-island communities in the Philippines prefer local measures  
476 to relocation in response to sea-level rise. *Nature Climate Change* 2017 7:8 7, 581–586  
477 (2017).
- 478 60. Colten, C. E. Raising Urban Land: Historical Perspectives on Adaptation. 135–142  
479 (2018) doi:10.1007/978-3-319-65663-2\_9.
- 480 61. Arnall, A., Thomas, D. S. G., Twyman, C. & Liverman, D. Flooding, resettlement, and  
481 change in livelihoods: Evidence from rural Mozambique. *Disasters* 37, 468–488 (2013).
- 482 62. Dunne, T. , Mertes, L. A. K. , Meade, R. H. , Richey, J. E. , & Forsberg, B. R. Exchanges  
483 of sediment between the flood plain and channel of the Amazon River in Brazil. *Bulletin*  
484 *of the Geological Society of America* 110(4), 450–467., (1998).
- 485 63. Nittrouer, C. A. & DeMaster, D. J. Sedimentary processes on the Amazon continental  
486 shelf: past, present and future research. *Cont Shelf Res* 6, 5–30 (1986).
- 487 64. Nittrouer, C. A. *et al.* Amazon Sediment Transport and Accumulation along the  
488 Continuum of Mixed Fluvial and Marine Processes. *Ann Rev Mar Sci* 13, 501–536  
489 (2021).
- 490 65. Nittrouer, C. A. *et al.* Amazon Sediment Transport and Accumulation along the  
491 Continuum of Mixed Fluvial and Marine Processes. *Ann Rev Mar Sci* 13, 501–536  
492 (2021).
- 493 66. Rine, J. M. & Ginsburg, R. N. Depositional facies of a mud shoreface in Suriname, South  
494 America; a mud analogue to sandy, shallow-marine deposits. *Journal of Sedimentary*  
495 *Research* 55, 633–652 (1985).
- 496 67. Morales, J. A. Evolution and facies architecture of the mesotidal Guadiana River delta  
497 (S.W. Spain-Portugal). *Mar Geol* 138, 127–148 (1997).
- 498 68. Fielding, C. R., Trueman, J. & Alexander, J. Sedimentology of the Modern and Holocene  
499 Burdekin River Delta of North Queensland, Australia—Controlled by River Output, not  
500 by Waves and Tides. *River Deltas-Concepts, Models, and Examples* 467–496 (2005)  
501 doi:10.2110/PEC.05.83.0467.
- 502 69. Fielding, C. R., Trueman, J. D. & Alexander, J. Holocene Depositional History of the  
503 Burdekin River Delta of Northeastern Australia: A Model for a Low-Accommodation,  
504 Highstand Delta. *Journal of Sedimentary Research* 76, 411–428 (2006).
- 505 70. Van Nguyen, L., Ta, T. K. O. & Tateishi, M. Late Holocene depositional environments  
506 and coastal evolution of the Mekong River Delta, Southern Vietnam. *J Asian Earth Sci*  
507 18, 427–439 (2000).
- 508 71. Ta, T. K. O. *et al.* Holocene delta evolution and sediment discharge of the Mekong River,  
509 southern Vietnam. *Quat Sci Rev* 21, 1807–1819 (2002).
- 510 72. Xue, Z., Liu, J. P., DeMaster, D., Van Nguyen, L. & Ta, T. K. O. Late Holocene Evolution  
511 of the Mekong Subaqueous Delta, Southern Vietnam. *Mar Geol* 269, 46–60 (2010).
- 512 73. Middelkoop, H., Erkens, G. & van der Perk, M. The Rhine delta-a record of sediment  
513 trapping over time scales from millennia to decades. *J Soils Sediments* 10, 1–12 (2010).

- 514 74. Erkens, Gilles. Sediment dynamics in the Rhine catchment : Quantification of fluvial  
515 response to climate change and human impact. 278 (2009).
- 516 75. Bobrovitskaya, N. N. & Meade, R. H. *Discharges and Yields of Suspended Sediment in*  
517 *the Ob' and Yenisey Rivers of Siberia. Erosion and Sediment Yield: Global and Regional*  
518 *Perspectives, IAHS Publication No. 236 (Pp. 115–123). . (1996).*
- 519 76. Hori, K., Saito, Y., Zhao, Q. & Wang, P. Architecture and evolution of the tide-dominated  
520 Changjiang (Yangtze) River delta, China. *Sediment Geol* 146, 249–264 (2002).
- 521 77. Liu, J. P. *et al.* Flux and fate of Yangtze River sediment delivered to the East China Sea.  
522 *Geomorphology* 85, 208–224 (2007).
- 523 78. Guerriero, R. & Penning-Rowsell, E. C. Innovation in flood risk management: An  
524 ‘Avenues of Innovation’ analysis. *J Flood Risk Manag* 14, e12677 (2021).
- 525 79. Sargentis, G. F. *et al.* Technological Advances in Flood Risk Assessment and Related  
526 Operational Practices Since the 1970s: A Case Study in the Pikrodafni River of Attica.  
527 *Water* 2025, Vol. 17, Page 112 17, 112 (2025).
- 528 80. Rozos, E., Dimitriadis, P. & Bellos, V. Machine Learning in Assessing the Performance  
529 of Hydrological Models. *Hydrology* 2022, Vol. 9, Page 5 9, 5 (2021).
- 530 81. Wang, L. *et al.* A review of the flood management: from flood control to flood resilience.  
531 *Heliyon* 8, (2022).
- 532 82. Rijkswaterstaat. Iconic structures. [https://www.rijkswaterstaat.nl/en/projects/iconic-](https://www.rijkswaterstaat.nl/en/projects/iconic-structures)  
533 [structures.](https://www.rijkswaterstaat.nl/en/projects/iconic-structures)
- 534 83. Van Vliet, M. T. H. *et al.* Global river discharge and water temperature under climate  
535 change. *Global Environmental Change* 23, 450–464 (2013).
- 536 84. Moragoda, N. & Cohen, S. Climate-induced trends in global riverine water discharge  
537 and suspended sediment dynamics in the 21st century. (2020)  
538 doi:10.1016/j.gloplacha.2020.103199.
- 539 85. Dunn, F. E. *et al.* Projections of declining fluvial sediment delivery to major deltas  
540 worldwide in response to climate change and anthropogenic stress. *Environmental*  
541 *Research Letters* 14, 084034 (2019).
- 542 86. De Lima, A. C. B. *et al.* Climate hazards in small and medium cities in the Amazon Delta  
543 and Estuary: challenges for resilience. *Environ Urban* 32, 195–212 (2020).
- 544 87. Amazon Cooperation Treaty Organization (ACTO). Strategic Action Program: Regional  
545 Strategy for the Integrated Management of Water Resources in the Amazon Basinazon  
546 Basin Project. [https://aguasamazonicas.otca.org/strategic-action-program/strategic-](https://aguasamazonicas.otca.org/strategic-action-program/strategic-actions/?lang=en)  
547 [actions/?lang=en.](https://aguasamazonicas.otca.org/strategic-action-program/strategic-actions/?lang=en)
- 548 88. Szlafsztein, C. F. & de Araújo, A. N. B. Autonomous flood adaptation measures in  
549 Amazonian cities (Belem, Brazil). *Natural Hazards* 108, 1069–1087 (2021).



- 550 89. Da Cunha Ávila, J. V., Clement, C. R., Junqueira, A. B., Ticktin, T. & Steward, A. M.  
551 Adaptive Management Strategies of Local Communities in Two Amazonian Floodplain  
552 Ecosystems in the Face of Extreme Climate Events. *J Ethnobiol* 41, 409–426 (2021).
- 553 90. Day, J. W., Ibáñez, C., Pont, D. & Scarton, F. Status and Sustainability of Mediterranean  
554 Deltas: The Case of the Ebro, Rhône, and Po Deltas and Venice Lagoon. in *Coasts and*  
555 *Estuaries: The Future* 237–249 (Elsevier, 2019). doi:10.1016/B978-0-12-814003-  
556 1.00014-9.
- 557 91. Rovira, A. & Ibáñez, C. Sediment management options for the lower Ebro River and its  
558 Delta. *J Soils Sediments* 7, 285–295 (2007).
- 559 92. Fatorić, S. & Chelleri, L. Vulnerability to the effects of climate change and adaptation:  
560 The case of the Spanish Ebro Delta. *Ocean Coast Manag* 60, 1–10 (2012).
- 561 93. Genua-Olmedo, A., Temmerman, S., Ibáñez, C. & Alcaraz, C. Evaluating adaptation  
562 options to sea level rise and benefits to agriculture: The Ebro Delta showcase. *Science*  
563 *of the Total Environment* 806, (2022).
- 564 94. Rovira, A. & Ibáñez, C. Sediment management options for the lower Ebro River and its  
565 Delta. *Journal of Soils and Sediments* vol. 7 285–295 Preprint at  
566 <https://doi.org/10.1065/jss2007.08.244> (2007).
- 567 95. Hinkel, J. *et al.* The ability of societies to adapt to twenty-first-century sea-level rise.  
568 *Nature Climate Change* 2018 8:7 8, 570–578 (2018).
- 569 96. Auerbach, L. W. *et al.* Flood risk of natural and embanked landscapes on the Ganges-  
570 Brahmaputra tidal delta plain. *Nat Clim Chang* 5, 153–157 (2015).
- 571 97. Rahman, M. M. *et al.* Ganges-Brahmaputra-Meghna delta, Bangladesh and India: a  
572 transnational mega-delta. in *Deltas in the Anthropocene* 23–51 (Palgrave Macmillan,  
573 Cham, 2020). doi:10.1007/978-3-030-23517-8\_2.
- 574 98. Uddin, S. A., He, L., Hossain, M. J., Nusrat, N. & Debi, M. Ganges-Brahmaputra-  
575 Meghna River Delta. *Delta Sustainability: A Report to the Mega-Delta Programme of*  
576 *the UN Ocean Decade* 89–116 (2024) doi:10.1007/978-981-97-7259-9\_6/FIGURES/9.
- 577 99. Government of the People’s Republic of Bangladesh. *National Adaptation Plan of*  
578 *Bangladesh 2023-2050*. (2022).
- 579 100. Inuvialuit Regional Corporation. *Inuvialuit on the Frontline of Climate Change: Final*  
580 *Report – February 2018*. moz-extension://a7cabc7c-3e4a-4570-bea7-  
581 a8ff0c99dd63/enhanced-  
582 reader.html?openApp&pdf=https%3A%2F%2Firc.inuvialuit.com%2Fwp-  
583 content%2Fuploads%2F2023%2F10%2FInuvialuit%2520on%2520the%2520Frontline  
584 %2520of%2520Climate%2520Change-Final-Feb2018%2520(SMALL).pdf (2018).
- 585 101. Winterwerp, J. C. *et al.* Managing erosion of mangrove-mud coasts with permeable  
586 dams – lessons learned. *Ecol Eng* 158, (2020).
- 587 102. Schmitt, K. & Albers, T. Area Coastal Protection and the Use of Bamboo Breakwaters  
588 in the Mekong Delta. in *Coastal Disasters and Climate Change in Vietnam: Engineering*

- 589        *and Planning Perspectives* 107–132 (Elsevier Inc., 2014). doi:10.1016/B978-0-12-  
590        800007-6.00005-8.
- 591    103.    Quoc Thanh, V. *et al.* Flooding in the Mekong Delta: The impact of dyke systems on  
592        downstream hydrodynamics. *Hydrol Earth Syst Sci* 24, 189–212 (2020).
- 593    104.    Powell, N., Osbeck, M., Bach, S. & Canh Toan, V. U. *Mangrove Restoration and*  
594        *Rehabilitation for Climate Change Adaptation in Vietnam World Resources Report Case*  
595        *Study.*        <http://www.worldresourcesreport.org/http://www.worldresourcesreport.org>  
596        (2011).
- 597    105.    Hoang, L. P. *et al.* Managing flood risks in the Mekong Delta: How to address emerging  
598        challenges under climate change and socioeconomic developments. *Ambio* 47, 635–649  
599        (2018).
- 600    106.    Mekong River Commission. *Mekong Climate Change Adaptation Strategy and Action*  
601        *Plan (MASAP)*. (Vientiane, Lao PDR: Mekong River Commission, 2018).
- 602    107.    Day, J. W. *et al.* Pattern and process of land loss in the Mississippi Delta: A spatial and  
603        temporal analysis of wetland habitat change. *Estuaries* 23, 425–438 (2000).
- 604    108.    Bailey, C., Gramling, R., Laska, S. B., Gramling, R. & Laska, S. B. Complexities of  
605        Resilience: Adaptation and Change within Human Communities of Coastal Louisiana.  
606        *Estuaries of the World* 125–140 (2014) doi:10.1007/978-94-017-8733-8\_9.
- 607    109.    Coastal Protection and Restoration Authority (CPRA). *2023 Coastal Master Plan:*  
608        *Executive Summary.*        [https://coastal.la.gov/wp-](https://coastal.la.gov/wp-content/uploads/2023/04/2023MP_Executive-Summary.pdf)  
609        [content/uploads/2023/04/2023MP\\_Executive-Summary.pdf](https://coastal.la.gov/wp-content/uploads/2023/04/2023MP_Executive-Summary.pdf) (2023).
- 610    110.    Day, J. W., Ibáñez, C., Pont, D. & Scarton, F. Status and Sustainability of Mediterranean  
611        Deltas: The Case of the Ebro, Rhône, and Po Deltas and Venice Lagoon. *Coasts and*  
612        *Estuaries: The Future* 237–249 (2019) doi:10.1016/B978-0-12-814003-1.00014-9.
- 613    111.    Ikehi, M. E., Onu, F. M., Ifeanyieze, F. O. & Paradang, P. S. Farming Families and  
614        Climate Change Issues in Niger Delta Region of Nigeria: Extent of Impact and  
615        Adaptation Strategies. *Agricultural Sciences* 05, 1140–1151 (2014).
- 616    112.    Nzeadibe, T. C. , Egbule, C. L. , Chukwuone, N. A. & Agu, V. C. Climate Change  
617        Awareness and Adaptation in the Niger Delta Region of Nigeria. *African Technology*  
618        *Policy Studies Network, Nairobi.* (2011).
- 619    113.    Ohwo, O. Climate Change Impacts, Adaptation and Vulnerability in the Niger Delta  
620        Region of Nigeria. 8, (2018).
- 621    114.    Eldeberky, Y. & Hünicke, B. the Netherlands VULNERABILITY OF THE NILE  
622        DELTA TO RECENT AND FUTURE CLIMATE CHANGE.
- 623    115.    Delta Programme Commissioner. *Delta Programme 2015. Working on the Delta. The*  
624        *Decisions to Keep the Netherlands Safe and Liveable.* (2015).
- 625    116.    de Vriend, H., Wang, Z., vanMaren, B. & Peng, Z. Rhine-Meuse-Scheldt Delta BT -  
626        Delta Sustainability: A Report to the Mega-Delta Programme of the UN Ocean Decade.  
627        263–292 (2024) doi:10.1007/978-981-97-7259-9\_14.

- 628 117. Penning-Rowsell, E. Floating architecture in the landscape: climate change adaptation  
629 ideas, opportunities and challenges. *Landsc Res* 45, 395–411 (2020).
- 630 118. International Boundary and Water Commission (IBWC). Flood Control Levee Systems.  
631 <https://www.ibwc.gov/flood-control-levee-systems/#rio-grande>.
- 632 119. Haasnoot, M. *et al.* Generic adaptation pathways for coastal archetypes under uncertain  
633 sea-level rise. *Environmental Research Communications* vol. 1 Preprint at  
634 <https://doi.org/10.1088/2515-7620/ab1871> (2019).
- 635
